# Supplementary material
Source: publisher figshare collection journal article supplement (https://geolsoc.figshare.com/ndownloader/files/5421671)
Supplement: Supplementary file 1 [file 5421671]

Table S3. 176Lu/177Hf ratios and Hf isotopic compositions (176Hf/177Hf) of four different zircon standards used during the course of this study
Standard	No. of Analyses	Mean 176Lu/177Hf	2_	Mean 176Hf/177Hf	2_	Reference 176Hf/177Hf	2_	Reference study
91500	45	0.00041	0.000036	0.282316	0.000033	0.282306	0.000008	Woodhead & Hergt 2005, solution
GJ1	9	0.000317	0.000041	0.282032	0.000026	0.282	0.000005	Morel et al. 2008, solution
Plesovice	7	0.000128	0.000036	0.282507	0.000017	0.282482	0.000013	Slama et al. 2008, laser/solution
BR266	6	0.000277	0.000009	0.281649	0.000037	0.28163	0.00001	Woodhead & Hergt 2005, solution
	Standard	176Lu/177Hf	2_	176Hf/177Hf	2_
	91500	0.000411	0.0000002	0.282311	0.000018
		0.000411	0.0000002	0.282316	0.000019
		0.000402	0.0000002	0.28231	0.000019
		0.0004	0.0000003	0.282315	0.00002
		0.000408	0.0000004	0.28228	0.000022
		0.000402	0.0000002	0.282316	0.000017
		0.000401	0.0000003	0.282322	0.00002
		0.0004	0.0000003	0.282297	0.000017
		0.000428	0.0000003	0.282294	0.000017
		0.000417	0.0000004	0.282295	0.000016
		0.000402	0.0000002	0.2823	0.000017
		0.000403	0.0000003	0.282328	0.000018
		0.000407	0.0000002	0.282312	0.000017
		0.000393	0.0000003	0.282306	0.000016
		0.000393	0.0000002	0.282315	0.000016
		0.000397	0.0000002	0.282302	0.000018
		0.000413	0.0000003	0.2823	0.000018
		0.000405	0.0000003	0.282312	0.000017
		0.000384	0.0000003	0.282294	0.000018
		0.000397	0.0000002	0.282294	0.000016
		0.000364	0.0000003	0.282315	0.000017
		0.000364	0.0000003	0.282317	0.000019
		0.000445	0.0000003	0.282313	0.000016
		0.000436	0.0000002	0.282329	0.000016
		0.000461	0.0000002	0.282325	0.000017
		0.000432	0.0000002	0.282308	0.000017
		0.000418	0.0000002	0.282295	0.000017
		0.000401	0.0000002	0.282344	0.000017
		0.000406	0.0000002	0.282317	0.000018
		0.000418	0.0000002	0.282323	0.000017
		0.000422	0.0000002	0.282347	0.000019
		0.000427	0.0000002	0.28235	0.000019
		0.000421	0.0000002	0.28234	0.000019
		0.000428	0.0000003	0.28232	0.000019
		0.000423	0.0000002	0.282328	0.000018
		0.000423	0.0000002	0.282336	0.000018
		0.000414	0.0000002	0.282328	0.000017
		0.000427	0.0000002	0.282331	0.000018
		0.000426	0.0000002	0.28235	0.000018
		0.000403	0.0000002	0.282316	0.000015
		0.000407	0.0000002	0.282326	0.000017
		0.000403	0.0000002	0.282311	0.000017
		0.000403	0.0000002	0.282317	0.000017
	Mean	0.00041	0.000036	0.282316	0.000033
	Reference Value	0.00031		0.282306	0.000008
	(Woodhead & Hergt 2005, solution ICP-MS)
	GJ-1	0.000289	0.0000002	0.28201	0.000016
		0.000292	0.0000002	0.282016	0.000013
		0.000326	0.0000004	0.282044	0.000016
		0.000311	0.0000005	0.282037	0.000015
		0.000355	0.0000001	0.28203	0.000014
		0.000327	0.0000015	0.282042	0.000016
		0.000315	0.0000008	0.282044	0.000015
		0.000311	0.0000005	0.282041	0.000015
		0.000332	0.0000014	0.282023	0.000016
	Mean	0.000317	0.000041	0.282032	0.000026
	Reference Value	0.00025		0.282	0.000005
	(Morel et al. 2008, solution ICP-MS)
	Plesovice	0.000133	0.0000018	0.282502	0.000016
		0.000087	0.0000002	0.282501	0.000017
		0.000137	0.0000014	0.282522	0.000012
		0.000136	0.0000026	0.282511	0.000013
		0.000131	0.0000026	0.282505	0.000015
		0.000133	0.0000026	0.282497	0.000013
		0.000136	0.0000017	0.282513	0.000012
	Mean	0.000128	0.000036	0.282507	0.000017
	Reference Value	0.0004-0.0015		0.282482	0.000013
	(Slama et al. 2008, laser ablation/solution ICP-MS)
	BR266	0.000276	0.0000002	0.281625	0.000019
		0.000272	0.0000001	0.281631	0.000016
		0.000282	0.0000001	0.281673	0.000015
		0.000284	0.0000002	0.281661	0.000015
		0.000272	0.0000001	0.281646	0.000016
		0.000277	0.0000002	0.281659	0.000018
	Mean	0.000277	0.000009	0.281649	0.000037
	Reference Value	0.000217		0.28163	0.00001
	(Woodhead & Hergt 2005, solution ICP-MS)
Morel, M.L.A., Nebel, O., Nebe-Jacobsen, Y.L., Miller, J.S. & Vroon, P.Z. 2008. Hafnium isotope characterization of the GJ-1 zircon reference material by solution and laser-ablation MC-ICP-MS. Chemical Geology, 255, 231–235.
Sláma, J., Košler, J., et al. 2008. Plešovice zircon—a new natural reference material for U–Pb and Hf isotopic microanalysis. Chemical Geology, 249, 1–35.
Woodhead, J.D. & Hergt, J.M. 2005. A preliminary appraisal of seven natural zircon reference materials for in situ Hf isotope determination. Geostandards and Geoanalytical Research, 29, 183–195.
